# Supplementary material
Source: publisher figshare collection journal article supplement (https://frontiersin.figshare.com/ndownloader/files/17581436)
Supplement: Supplementary file [file 17581436]

## Supplementary data

Figure S1

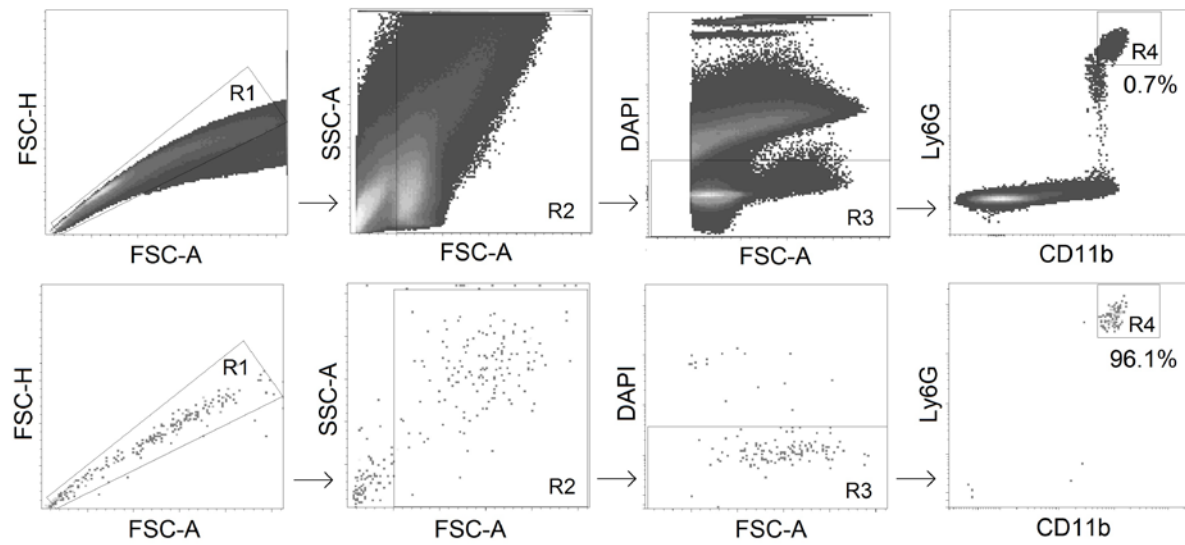

**Figure S1. Gating strategy for neutrophils.** Single alive CD11b<sup>+</sup>Ly6G<sup>hi</sup> neutrophils (R4) were sorted, purity assessment (lower graphs) showed >95% purity.

**Figure S2**

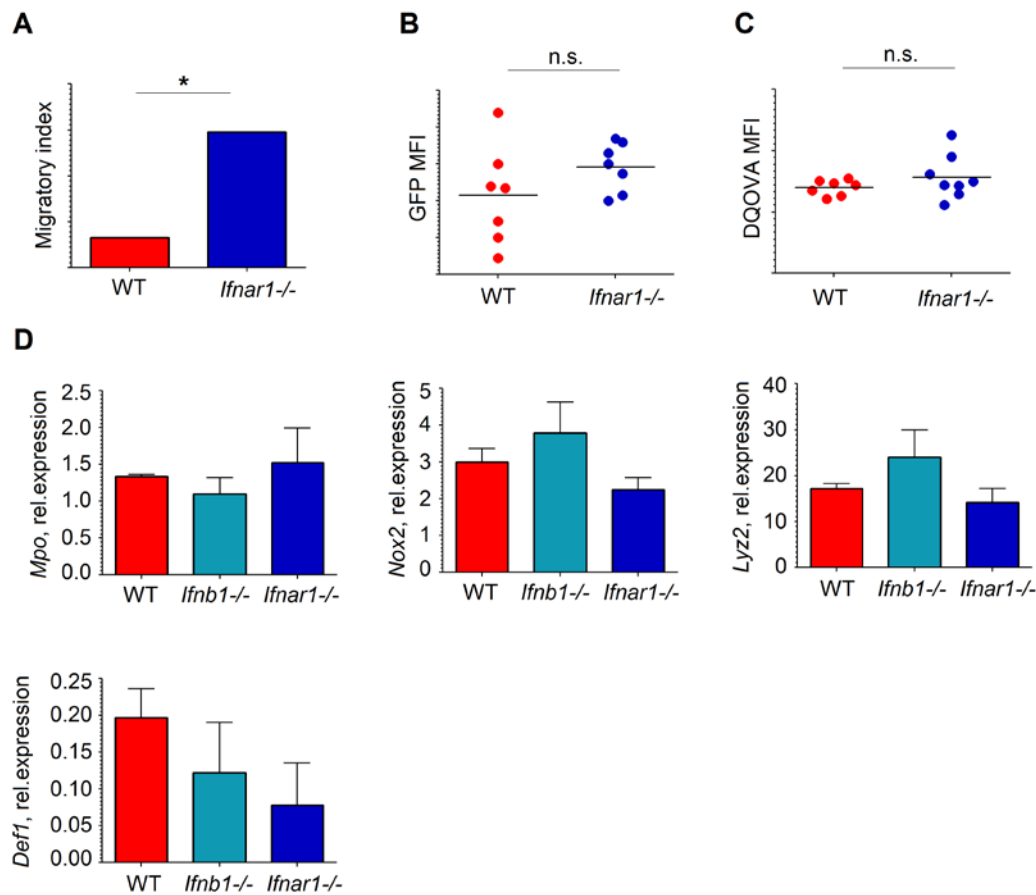

**Figure S2. Functional comparison of neutrophils isolated from lungs of WT vs. IFN-deficient mice.** **A.** Elevated migratory capacity of *Ifnar1*<sup>-/-</sup> neutrophils. Lung neutrophils were isolated from *Ifnar1*<sup>-/-</sup> and WT mice and migration analyzed as described in Material and Methods. **B-D** Similar characteristic of *Ifnar1*<sup>-/-</sup> and WT neutrophils. Lung neutrophils were isolated from *Ifnar1*<sup>-/-</sup> and WT mice, and phagocytosis (**B**), endocytosis and phagolysosomal degradation (**C**) analyzed. Data are shown as individual points and mean. Expression of genes involved in antibacterial responses in isolated lung WT vs. *Ifnb1*<sup>-/-</sup> and *Ifnar1*<sup>-/-</sup> neutrophils (**D**) was analyzed: *Mpo*, *Nox2*, *Lyz2*, *Def1*, data are shown as mean  $\pm$  SEM, \*  $p < 0.05$ .
